# Supplementary material
Source: ML conference proceedings conference paper supplement (https://openaccess.thecvf.com/content/CVPR2022/html/Ono_Degree-of-Linear-Polarization-Based_Color_Constancy_CVPR_2022_paper.html)
Supplement: Supplementary file 1 [file Ono_Degree-of-Linear-Polarization-Based_Color_Constancy_CVPR_2022_supplemental.zip]

Archive with 3 entries (3 files):
- 04112_supp/04112-supp.pdf
- 04112_supp/colchart_under_var_illum.mp4
- 04112_supp/README.txt
