# Supplementary material
Source: ML conference proceedings conference paper supplement (https://openaccess.thecvf.com/content/CVPR2022/html/Ono_Degree-of-Linear-Polarization-Based_Color_Constancy_CVPR_2022_paper.html)
Supplement: Supplementary file 1 [file Ono_Degree-of-Linear-Polarization-Based_Color_Constancy_CVPR_2022_supplemental.zip › 04112_supp/README.txt]

This folder includes the following files:

1. colchart_under_var_illum.mp4
    -- A movie of color charts illuminated by different illuminations.
2. 04112-supp.pdf
    -- Supplementary text of 'Degree-of-linear-polarization-based Color Constancy.'
